# Supplementary material for: Investigation of Correlations Between Optical Coherence Tomography Biomarkers and Visual Acuity in X-Linked Retinoschisis
Source: PubMed Central journal article supplement (PMC8828641; doi:10.3389/fmed.2021.734888), 2022-01-27
Supplement: Image_1.pdf [file Image_1.pdf]

Supplementary materials for

**Investigation of Correlations Between Optical Coherence Tomography  
Biomarkers and Visual Acuity in X-Linked Retinoschisis**

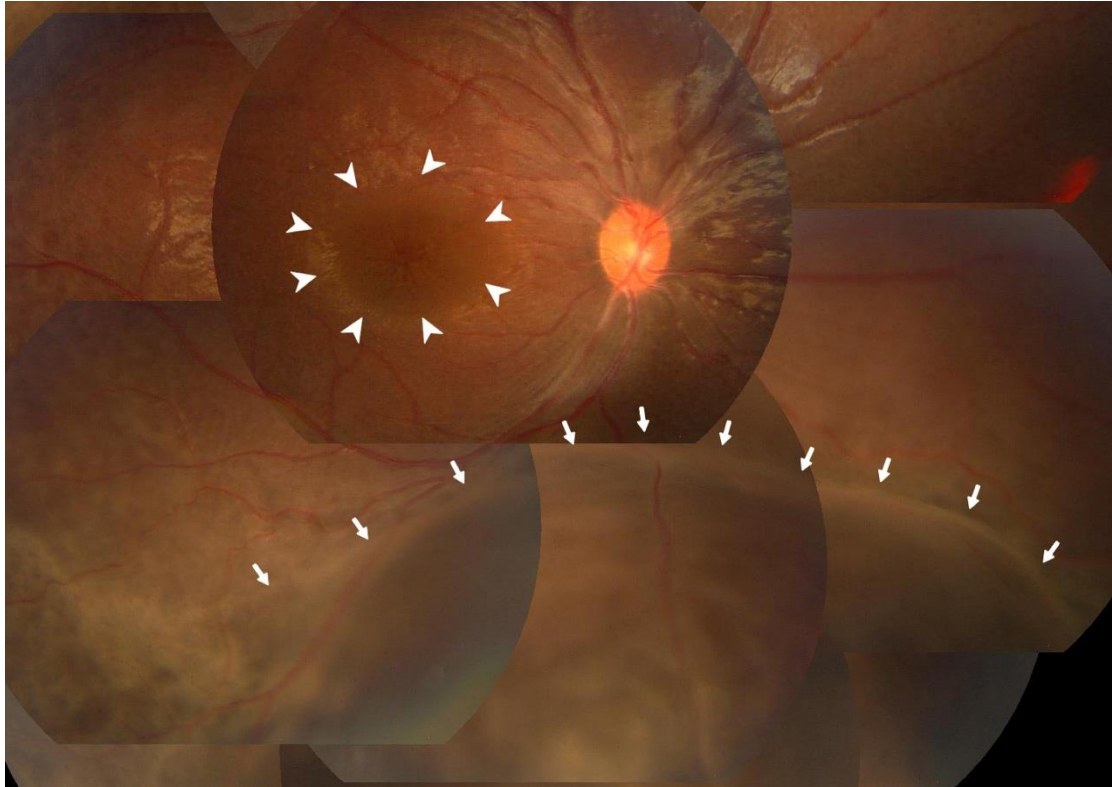

Figure S1. Fundus photograph of an XLRS patient with spoke-like macular retinoschisis (arrowheads) and peripheral retinoschisis (arrows).
